# Supplementary material
Source: PubMed Central journal article supplement (PMC6646223)
Supplement: ao8b01985_si_001.pdf [file ao8b01985_si_001.pdf]

# Surface patterning with SiO<sub>2</sub>@PNiPAm core-shell particles

*Jo Sing Julia Tang<sup>a,‡</sup>, Romina Sigrid Bader<sup>a,‡</sup>, Eric S.A. Goerlitzer<sup>a</sup>, Jan Fedja Wendisch<sup>b</sup>,  
Gilles Remi Bourret<sup>b</sup>, Marcel Rey<sup>a</sup>, Nicolas Vogel<sup>a,\*</sup>*

<sup>a</sup> Institute of Particle Technology, Friedrich-Alexander University Erlangen-Nürnberg,  
Cauerstrasse 4, 91058 Erlangen, Germany

<sup>b</sup> Department of Chemistry and Physics of Materials, University of Salzburg, Jakob Haringer  
Strasse 2A, A-5020 Salzburg, Austria

Supporting Information:

*Table S1 Respective amounts used for batch reaction.*

|           | Crosslinking<br>density (BIS) | n(BIS)               | m(BIS) | V(H <sub>2</sub> O) | m(Silica<br>dispersion) |
|-----------|-------------------------------|----------------------|--------|---------------------|-------------------------|
|           | [mol%]                        | [mmol]               | [mg]   | [mL]                | [g]                     |
| JT049b-S9 | 5                             | $1.25 \cdot 10^{-1}$ | 19.3   | 45                  | 3.767                   |
| JT049b-S3 | 5                             | $1.25 \cdot 10^{-1}$ | 19.3   | 46                  | 2.852                   |
| JT049b-S1 | 5                             | $1.25 \cdot 10^{-1}$ | 19.3   | 45                  | 3.767                   |
| JT049b-S7 | 2.5                           | $6.25 \cdot 10^{-2}$ | 9.636  | 45                  | 3.767                   |
| JT049b-S8 | 10                            | $2.5 \cdot 10^{-1}$  | 38.543 | 45                  | 3.767                   |

*Table S2 Amounts of reagents used for semi-batch reaction for further shell growth.*

|           | Crosslinking<br>density<br>(BIS) | m (BIS) | c (NiPAm) | V(H <sub>2</sub> O) | n(NiPAm) | m(NiPAm) |
|-----------|----------------------------------|---------|-----------|---------------------|----------|----------|
|           | [mol%]                           | [mg]    | [mmol/mL] | [mL]                | [mmol]   | [mg]     |
| JT049b-S9 | 5                                | 43.9    | 2         | 2.85                | 5.7      | 645      |
| JT049b-S3 | 5                                | 63.4    | 2         | 4.5                 | 9        | 1018     |
| JT049b-S1 | 5                                | 19.27   | 2         | 9                   | 18       | 2037     |
| JT049b-S7 | 2.5                              | 69.377  | 2         | 9                   | 18       | 2037     |
| JT049b-S8 | 10                               | 277.506 | 2         | 9                   | 18       | 2037     |

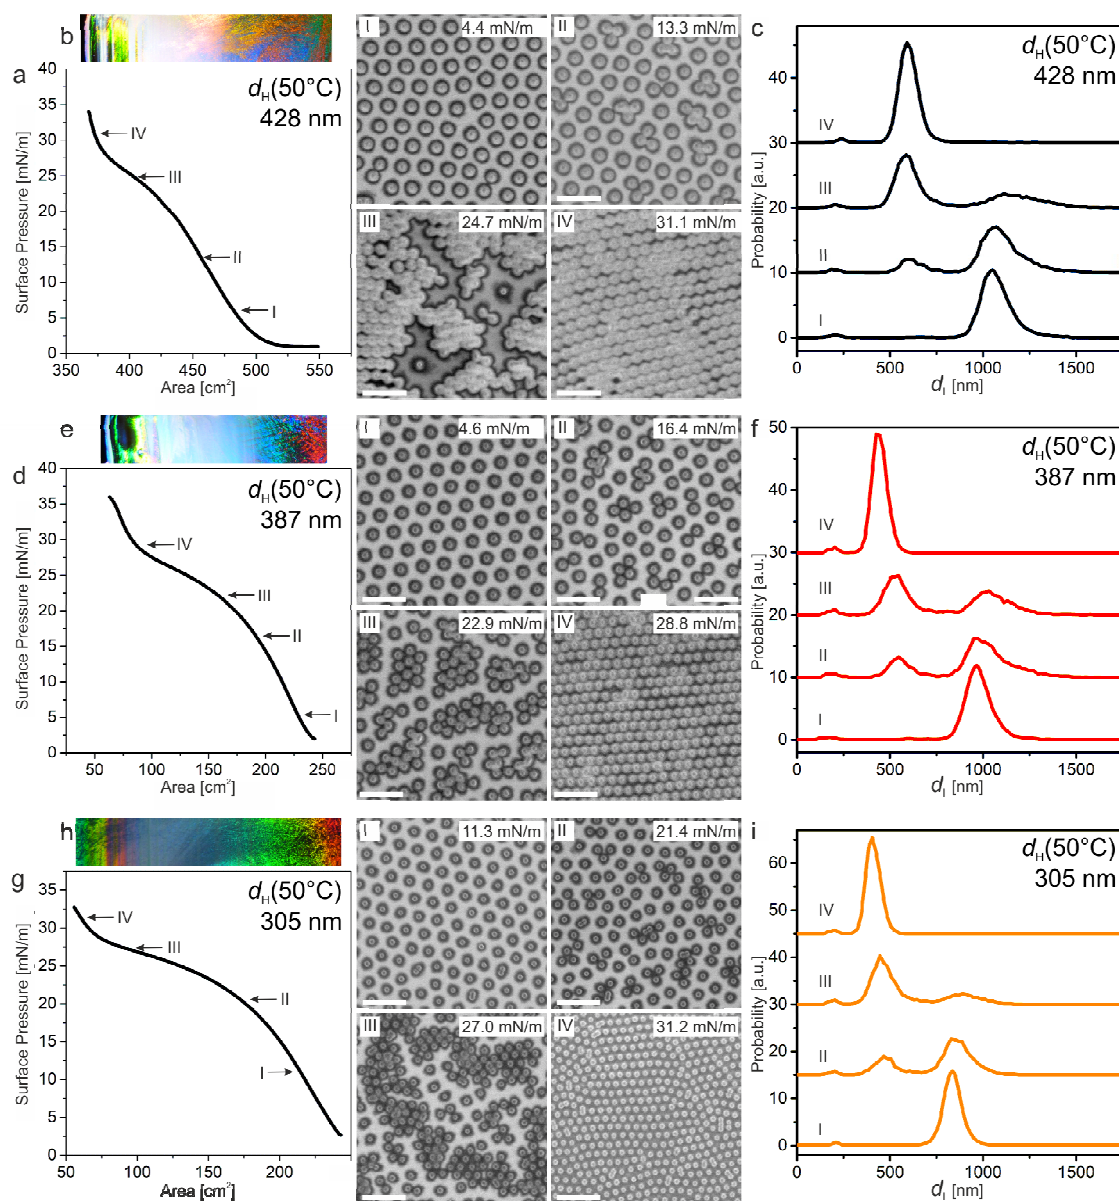

Figure S1: Influence of shell thickness on the phase diagram of  $\text{SiO}_2@\text{PNiPAm}$  core-shell particles: a-g)  $d_H(50\text{ }^\circ\text{C}) = 428\text{ nm}$ , h-n)  $d_H(50\text{ }^\circ\text{C}) = 387\text{ nm}$ , o-u)  $d_H(50\text{ }^\circ\text{C}) = 305\text{ nm}$ . a,d,g) Surface pressure – area isotherm. b,e,h) Optical image of the deposited silicon wafer. The regions correspond to the compression isotherm in (a,d,g), displaying the structural colors of the hexagonal non-close packed and close packed phase connected by the whitish phase transition region. The Roman numbers label representative SEM images of the observed

phases. Scale bar: 2  $\mu\text{m}$ . c,f,i) Interparticle distance distribution of the different phases labelled by the Roman numbers showing the nucleation of a second hexagonal phase.
